# Supplementary material
Source: publisher figshare collection journal article supplement (https://gsapubs.figshare.com/ndownloader/files/24723872)
Supplement: Supplementary file 1 [file 24723872]

## Sheet: Sheet1
TABLE S6. ZIRCON GEOCHRONOLOGY DATA COLLECTED AT THE UNIVERSITY OFTASMANIA
			207 cor 206Pb/238U		206Pb/238U		208Pb/232Th		207Pb/206Pb		spot size	repetition	fluence	mode	Hg202	Pb204	Pb206	Pb207	Pb208	Th232	U238	Ti49	Fe56	Zr91	Hf178	Analysis
			age	+/-1 ster	ratio	+/-1 RSE	ratio	+/-1 RSE	ratio	+/-1 RSE	micron	rate Hz	Jcm-2													#
U1438	E	68	2	28	30	1458.07	1458.09
351-U1438E68	DE22B175	ok	43.4788	3.94818	0.00790361	0.0786211	0.00393539	0.12138	0.160737	0.193249	9µm	5	1.72	spot	109.558	0.0001	516.841	83.6585	322.363	86446.5	84993	1366.44	729323	602069	83728.5	67
351-U1438E68	DE22B172	ok	48.4529	2.33847	0.00769678	0.0466639	0.0027232	0.0829687	0.0626425	0.158497	9µm	5	1.72	spot	0.0001	36.9935	752.648	47.4749	287.199	91233.9	108316	68.3287	115301	4.20188e+06	393775	64
Primary callibration standards for U-Pb and Th-Pb ratios
91500	DE22B176	ok	1027.01	32.9988	0.175989	0.0328843	0.0567071	0.0852043	0.089119	0.0501238	9µm	5	1.72	spot	0.0001	13.5577	1992.15	171.836	247.492	3783.18	12770.4	9.14634	0.1	4.43305e+06	261791	68
91500	DE22B154	ok	1040.64	35.3569	0.175923	0.0347975	0.0499699	0.0989308	0.0774636	0.0604537	9µm	5	1.72	spot	0.0001	12.4227	2282.64	177.963	251.761	4339.86	14366.2	24.8207	0.1	4.6648e+06	266423	46
91500	DE22B235	ok	1052.61	34.3493	0.177985	0.0334362	0.0542902	0.0813984	0.077291	0.0575612	9µm	5	1.72	spot	73.8004	0.0001	2150.87	166.174	235.336	4030.47	13648	11.1407	0.1	4.41432e+06	245960	127
91500	DE22B199	ok	1052.68	36.8863	0.177386	0.0356821	0.0539804	0.103514	0.0718189	0.0743932	9µm	5	1.72	spot	0.0001	16.3551	2156.37	156.055	253.878	4094.59	13482.1	14.5265	572.354	4.43668e+06	253654	91
91500	DE22B113	ok	1058.55	42.8869	0.179156	0.0413346	0.049387	0.107856	0.077893	0.0821643	9µm	5	1.72	spot	7.29198	14.2577	2399.91	180.38	241.093	4543.94	15429.6	11.0714	420.773	5.38379e+06	307456	5
91500	DE22B135	ok	1059.75	39.0322	0.178678	0.0375098	0.0486867	0.0918466	0.0687522	0.0706559	9µm	5	1.72	spot	0.0001	0.0001	2154.32	148.996	213.668	3763.2	13348.4	8.89527	0.1	4.77545e+06	276984	27
91500	DE22B114	ok	1061.83	33.592	0.179059	0.0322532	0.0568895	0.106632	0.068714	0.0575573	9µm	5	1.72	spot	8.42952	14.7571	2366.67	160.474	298.463	4593.74	14695.3	20.8752	0.1	4.76461e+06	267548	6
91500	DE22B217	ok	1075.08	39.3762	0.181485	0.037317	0.0603852	0.0975563	0.0700495	0.0706787	9µm	5	1.72	spot	56.6736	2.61745	2104.31	145.868	251.007	3884.68	12871.1	31.7791	0.1	4.48339e+06	253227	109
91500	DE22B234	ok	1088.71	33.1066	0.183986	0.0309438	0.046445	0.101611	0.0738833	0.0665311	9µm	5	1.72	spot	0.0001	6.98089	2327.63	173.214	211.337	4158.29	14164.1	20.5166	1178.95	4.49745e+06	257831	126
91500	DE22B180	ok	1094.37	35.2088	0.185025	0.032807	0.0532362	0.0917912	0.0747134	0.0670085	9µm	5	1.72	spot	44.2632	0.0001	2278.4	170.574	238.417	4168.58	13784.9	16.6069	416.468	4.49873e+06	251036	72
secondary (check) standards for U-Pb ages
GJ1	DE22B232	ok	584.863	15.419	0.0953659	0.0268806	0.0261074	0.239715	0.0628748	0.040246	9µm	5	1.72	spot	5.30797	0.0001	5388.31	335.814	42.9699	1730.39	63131.1	8.39311	0.1	4.48437e+06	314712	124
GJ1	DE22B115	ok	590.668	14.4702	0.0959563	0.02492	0.0307484	0.195093	0.0582236	0.0429437	9µm	5	1.72	spot	0.0001	0.0001	5451.2	315.828	60.1148	1865.96	62528.1	2.15208	0.1	4.53207e+06	319125	7
GJ1	DE22B137	ok	597.683	15.3351	0.0971496	0.0260608	0.0222952	0.23674	0.0578962	0.048409	9µm	5	1.72	spot	0.0001	20.3056	6027.14	351.043	54.2628	2197.73	71649	9.66309	0.1	5.24349e+06	356827	29
GJ1	DE22B178	ok	598.518	14.4435	0.0979792	0.0244629	0.022717	0.257235	0.0655957	0.0489926	9µm	5	1.72	spot	0.0001	5.56114	5663.06	369.725	49.4854	1977.48	66590.8	15.2421	669.339	4.94337e+06	332307	70
GJ1	DE22B157	ok	605.742	15.9393	0.0985222	0.0267889	0.0290697	0.206167	0.0573571	0.0405864	9µm	5	1.72	spot	9.79307	24.5762	5177.57	298.912	52.5109	1557.09	58188.8	10.5811	0.1	4.35058e+06	305042	49
GJ1	DE22B201	ok	606.171	16.6406	0.0990364	0.0279196	0.0218278	0.248289	0.063714	0.0504652	9µm	5	1.72	spot	0.0001	10.9389	6050.63	388.484	49.0171	2052.35	70509.8	16.1111	0.1	5.16846e+06	353979	93
Temora	DE22B156	ok	383.55	17.582	0.0617882	0.0457204	0.0206462	0.112776	0.0606292	0.125115	9µm	5	1.72	spot	36.3689	1.88883	991.064	60.4786	178.121	7801.25	18478.8	43.8462	0.1	5.22606e+06	431152	48
Temora	DE22B138	ok	416.25	19.5157	0.0667011	0.0468494	0.015962	0.133101	0.0493592	0.127473	9µm	5	1.72	spot	0.0001	0.0001	785.304	38.9957	99.0676	5325.8	13034.4	23.3501	0.1	4.51937e+06	380346	30
Temora	DE22B116	ok	422.919	19.5952	0.0678051	0.0465022	0.0210885	0.142485	0.0537322	0.120237	9µm	5	1.72	spot	0.0001	18.8846	870.761	43.7016	88.9168	3783.18	14135.4	22.2382	0.1	4.65685e+06	380160	8
Temora	DE22B233	ok	400.012	12.341	0.0644409	0.0308398	0.021057	0.116062	0.0600095	0.0821808	9µm	5	1.72	spot	45.5549	0.0001	1889.92	113.945	178.731	7758.55	32665.4	20.0502	0.1	4.52865e+06	402295	125
Temora	DE22B179	ok	409.03	15.4076	0.0662379	0.0374847	0.0223711	0.121701	0.0638445	0.104872	9µm	5	1.72	spot	14.8217	0.0001	942.797	56.7405	117.552	4584.29	15755.9	29.5368	0.1	4.47013e+06	391570	71
Temora	DE22B219	ok	411.343	17.6204	0.0658893	0.0429921	0.0182668	0.0948412	0.0481403	0.0894258	9µm	5	1.72	spot	0.0001	0.0001	1681.85	79.3675	313.595	14871.4	29492.1	27.3504	950.59	5.12317e+06	413817	111
Primary standard for Pb isotope and trace element concentrations:
NIST610	DE22B111	ok			0.194753	0.020965	0.383142	0.0371894	0.914387	0.00427785	29µm	5	1.72	spot	271.128	9520.26	162783	149629	356819	788483	920051	16200.6	276456	47992.4	229087	3
NIST610	DE22B237	ok			0.195825	0.0226637	0.397194	0.0377858	0.907376	0.00477686	29µm	5	1.72	spot	288.964	8806.74	153743	140386	337589	744070	868282	15493.6	258757	45605	216443	129
NIST610	DE22B218	ok			0.203835	0.0226829	0.416442	0.036586	0.910787	0.00488794	29µm	5	1.72	spot	196.336	8983.36	158208	144741	349382	766728	894912	15669.2	266634	46043.9	223520	110
NIST610	DE22B112	ok			0.194907	0.0216742	0.383828	0.0370105	0.904806	0.00463303	29µm	5	1.72	spot	230.502	9022.28	158255	143682	348762	770149	893745	15943.6	265223	49028.9	223761	4
NIST610	DE22C239	ok			0.197921	0.0226325	0.394937	0.037579	0.90621	0.00390173	29µm	5	1.72	spot	214.024	8856.85	154264	140986	338543	748539	861149	15543.2	260505	46865.5	217100	131
NIST610	DE22B177	ok			0.203348	0.0214161	0.407433	0.0370978	0.909046	0.00431749	29µm	5	1.72	spot	184.71	9322.95	163356	149363	359069	797332	921680	16360.4	275204	48146.3	233487	69
NIST610	DE22B236	ok			0.202902	0.0216356	0.419091	0.0368024	0.908749	0.00426702	29µm	5	1.72	spot	199.712	8843.89	157198	143746	345337	756081	893986	15672.9	264987	45465.3	221564	128
NIST610	DE22B136	ok			0.205445	0.0211091	0.415887	0.00993991	0.907956	0.00452409	29µm	5	1.72	spot	248.903	9275.92	160546	146640	352839	765916	902498	16055.2	272907	46997.2	224886	28
NIST610	DE22C238	ok			0.198183	0.0224104	0.400908	0.0377204	0.903162	0.00405214	29µm	5	1.72	spot	242.624	8558.33	151883	138220	332800	727635	850448	14858.1	256598	45247.1	212826	130
NIST610	DE22B200	ok			0.202811	0.0186428	0.417321	0.0116665	0.905068	0.00466715	29µm	5	1.72	spot	193.644	8960.76	157890	144000	348233	760077	896060	15748.1	268381	45476.8	223624	92
NIST610	DE22B155	ok			0.204218	0.0205071	0.402447	0.0131777	0.903797	0.00431993	29µm	5	1.72	spot	279.93	9322.56	162518	147836	352924	792792	916810	16229.8	274499	46497.7	230775	47
